# Supplementary figures and images for: DNA Sudoku—harnessing high-throughput sequencing for multiplexed specimen analysis
Source: HighWire-hosted journal article supplement (doi:10.1101/gr.092957.109), 2009-05-15

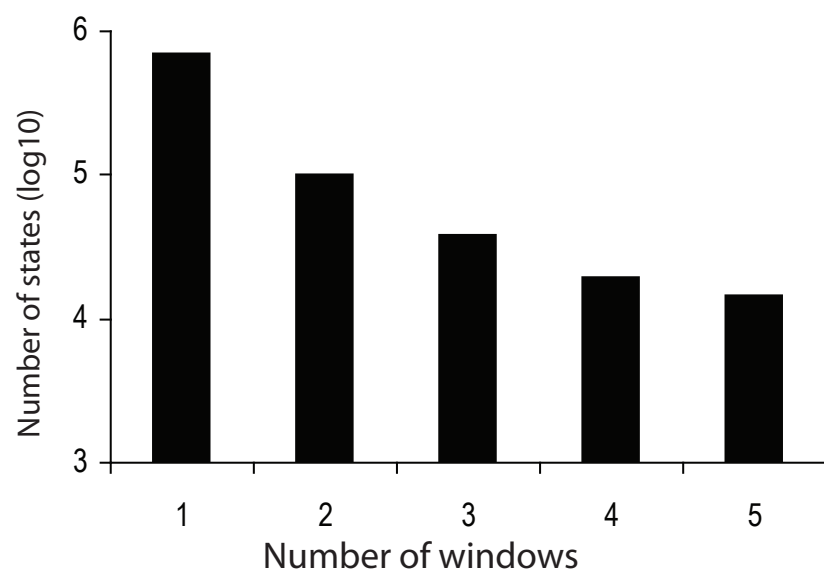

Supplement: Erlich_092957_Supp_Fig8.pdf [file Erlich_092957_Supp_Fig8.pdf]
